# Supplementary material for: A simple one-pot synthesis of highly fluorescent nitrogen-doped graphene quantum dots for the detection of Cr(vi) in aqueous media
Source: Royal Society of Chemistry journal article supplement (doi:10.1039/c4ra09320h), 2014-10-08
Supplement: c4ra09320h1.pdf [file c4ra09320h1.pdf]

Electronic Supplementary Information

**A simple one-pot synthesis of highly fluorescent  
nitrogen-doped grapheme quantum dots for the  
detection of Cr(VI) in aqueous media**

**Fei Cai,<sup>a</sup> Xidong Liu,<sup>b</sup> Shuang Liu,<sup>b</sup> Hong Liu,<sup>\*c</sup> Yuming Huang<sup>\*a</sup>**

*<sup>a</sup> Key Laboratory of Luminescent and Real-Time Analytical Chemistry, Ministry of Education; College of Chemistry and Chemical Engineering, Southwest University, Chongqing 400715, PR China.*

*<sup>b</sup>College of Materials and Chemical Engineering, Chongqing University of Arts and Sciences, Chongqing 402160, PR China*

*<sup>c</sup>Chongqing Institute of Green and Intelligent Technology, Chinese Academy of Sciences, Chongqing 401122, PR China*

**Table S1.** QY of the as-synthesized N-GQDs

| Sample          | Integrated emission intensity ( <i>I</i> ) | Abs at 360 nm wavelength ( <i>A</i> ) | Refractive index of solvent ( <i>n</i> ) | Quantum Yield (%) |
|-----------------|--------------------------------------------|---------------------------------------|------------------------------------------|-------------------|
| Quinine sulfate | 3200                                       | 0.045                                 | 1.33                                     | 57.7              |
| N-GQDs          | 732                                        | 0.032                                 | 1.33                                     | 18.6              |
| GQDs            | 104                                        | 0.035                                 | 1.33                                     | 2.4               |

**Table S2.** Relative fluorescence intensities ( $F/F_0$  at 430 nm) of the N-GQDs solution after addition of some organic compounds and polymers.

| The tested organic substances and polymers | Reported concentration        | Ref. | Selected concentration     | $F/F_0^*$ (% , mean $\pm$ SD) |
|--------------------------------------------|-------------------------------|------|----------------------------|-------------------------------|
| Acetic acid                                | 13.01 mg L <sup>-1</sup>      | [1]  | 50 mg L <sup>-1</sup>      | 101.14 $\pm$ 0.31             |
| Propionic acid                             | 1.72 mg L <sup>-1</sup>       | [1]  | 10 mg L <sup>-1</sup>      | 99.44 $\pm$ 2.09              |
| n-butyric acid                             | 2.71 mg L <sup>-1</sup>       | [1]  | 10 mg L <sup>-1</sup>      | 102.03 $\pm$ 1.53             |
| Isobutyric acid                            | 1.25 mg L <sup>-1</sup>       | [1]  | 10 mg L <sup>-1</sup>      | 103.02 $\pm$ 0.25             |
| valeric acid                               | n.d                           | [1]  | 10 mg L <sup>-1</sup>      | 99.54 $\pm$ 0.86              |
| Phenol                                     | 8.43 $\mu$ g L <sup>-1</sup>  | [1]  | 10 $\mu$ g L <sup>-1</sup> | 99.13 $\pm$ 1.40              |
| Humic acid                                 | 3.5 mg L <sup>-1</sup>        | [2]  | 5 mg L <sup>-1</sup>       | 96.14 $\pm$ 0.23              |
| 2,4-dinitrophenol                          | 0.2-6 $\mu$ g L <sup>-1</sup> | [3]  | 10 $\mu$ g L <sup>-1</sup> | 96.27 $\pm$ 0.59              |
| Pyrrole                                    | /                             | /    | 0.01 M                     | 98.58 $\pm$ 3.24              |
| Pyrrole                                    | /                             | /    | 0.03 M                     | 91.51 $\pm$ 1.18              |
| Pyrrole                                    | /                             | /    | 0.05 M                     | 82.94 $\pm$ 4.48              |
| Chitosan                                   | /                             | /    | 0.01% (w/w)                | 97.72 $\pm$ 0.73              |
| Chitosan                                   | /                             | /    | 0.03% (w/w)                | 96.44 $\pm$ 1.67              |
| Chitosan                                   | /                             | /    | 0.05% (w/w)                | 86.83 $\pm$ 1.39              |

\*  $F_0$  and  $F$  are the fluorescence intensities of N-GQDs in the absence and presence of the tested substances, respectively.

## References

1. M. Huang, Y. Li and G. Gu, Desalination, 2010, 262, 36-42.
2. L. Li, Y. Huang, Y. Wang, W. Wang, Anal. Chim. Acta, 2009, 631, 182-188.
3. E. Pocerull, R.M. Marce, F. Borrull, J.L. Bernal, L. Toribio, M.L. Serna, J. Chromatogr. A, 1996, 755, 67-74.

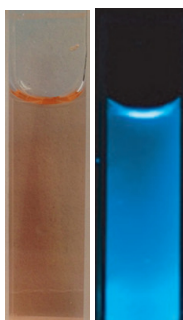

**Figure S1.** The photographs of  $52 \text{ mg L}^{-1}$  N-GQGs without (left) and with (right) an irradiation of 365 nm UV light.

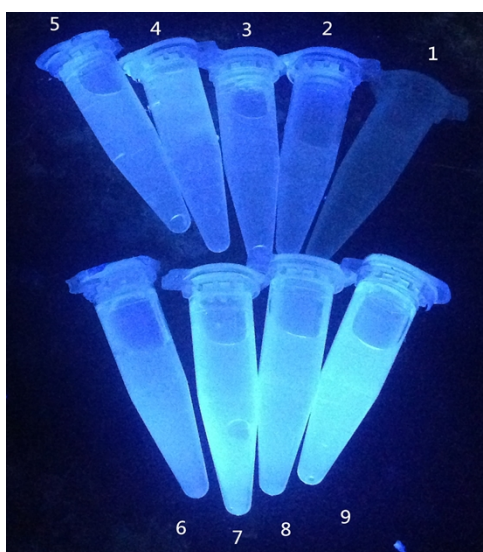

**Figure S2.** The photograph of the as-prepared products from different molar ratios of ammonia to CA with an irradiation of 365 nm UV light. The products were prepared by hydrothermal reaction of different molar ratios of ammonia to CA at  $200 \text{ }^\circ\text{C}$  for 10 h. The molar ratios of ammonia to CA for 1 to 9 in the photograph are 0:1, 1:1.5, 1:3, 1:5, 1:8, 1.2:1, 3:1, 6:1, and 12:1, respectively.

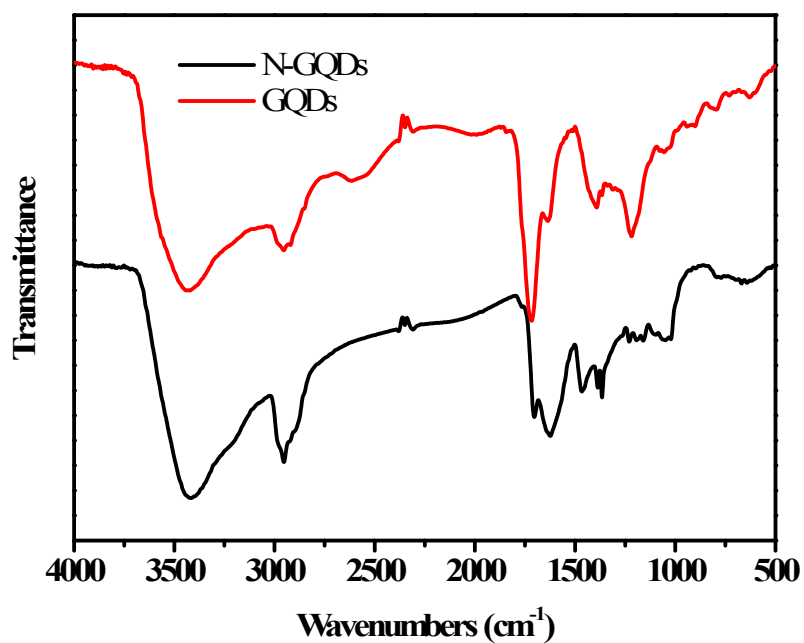

Figure S3. FT-IR spectra of GQDs and N-GQGs.

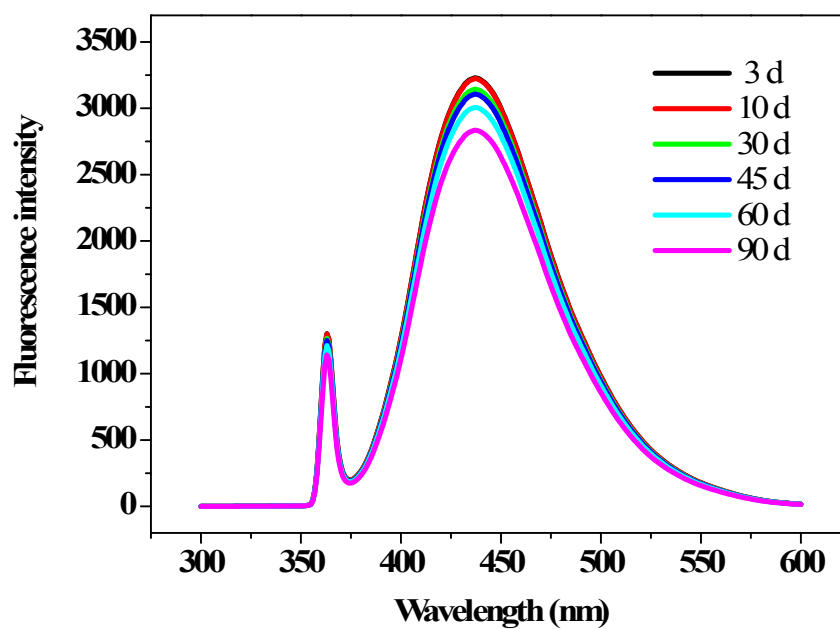

Figure S4. Variation of the fluorescence intensity of  $52 \text{ mg L}^{-1}$  N-GQGs with time.

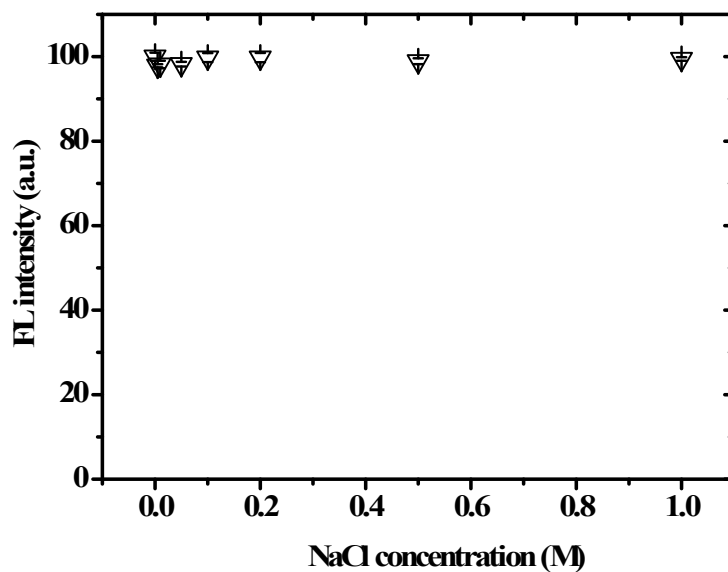

**Figure S5.** Effect of NaCl concentration on the fluorescence intensity of 52 mg L<sup>-1</sup> N-GQDs. Error bars represent one standard deviation for three measurements.

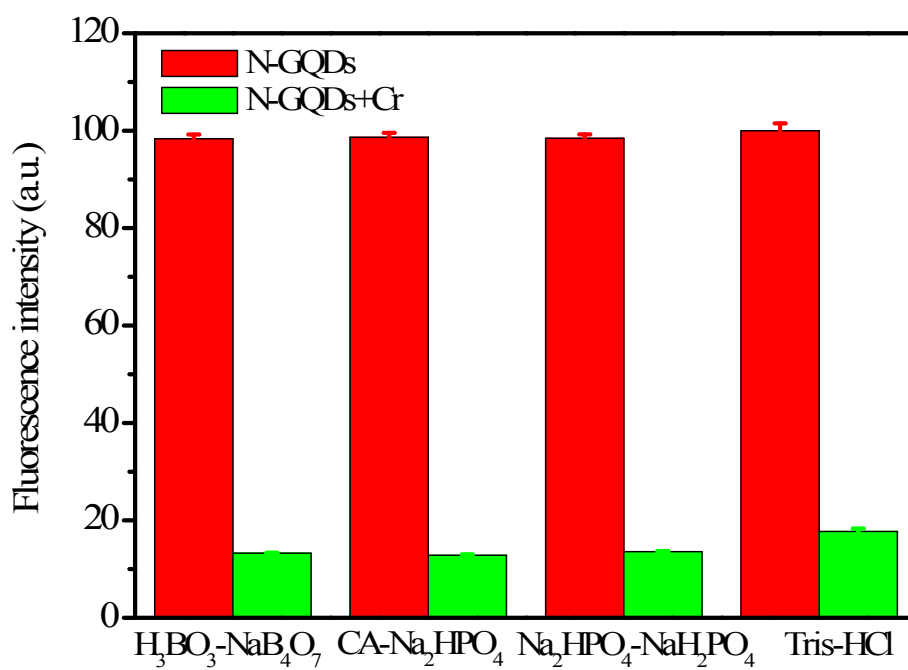

**Figure S6.** Effect of different buffer system (pH=7.4) on the FL response of N-GQDs.

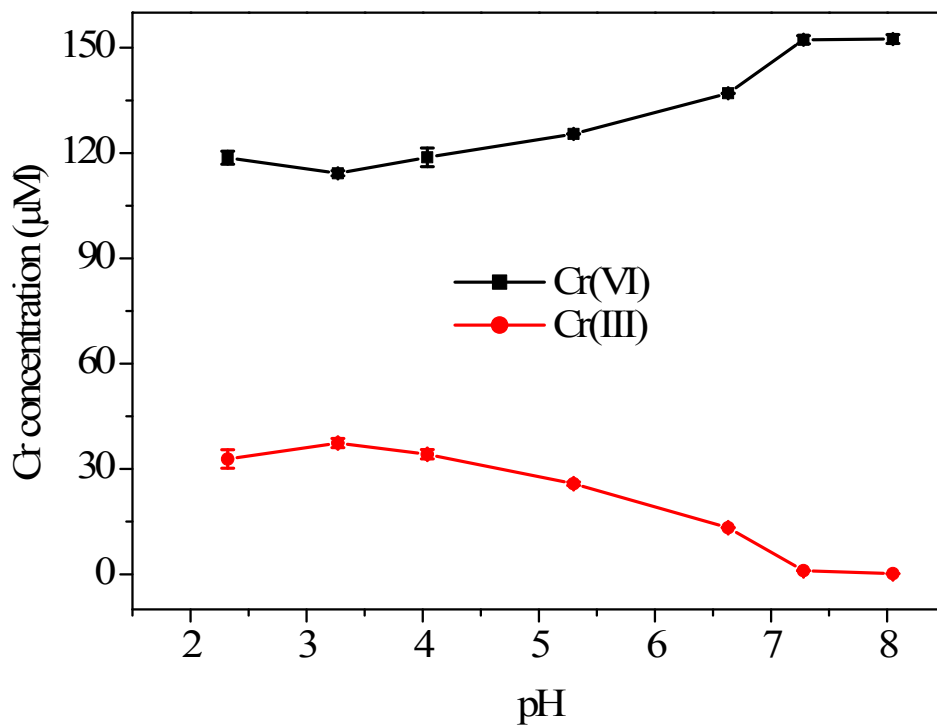

**Figure S7.** Concentrations of Cr(III) and Cr(VI) at different initial pH values after reaction between N-GQDs and Cr(VI).

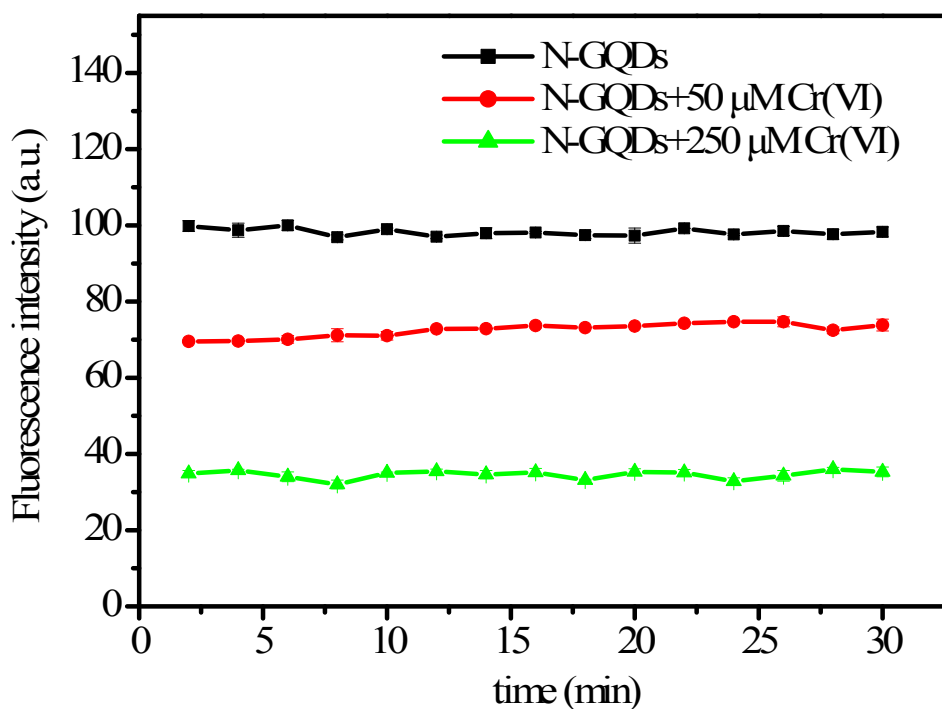

Figure S8. Kinetics of reactions between N-GQDs and Cr(VI).

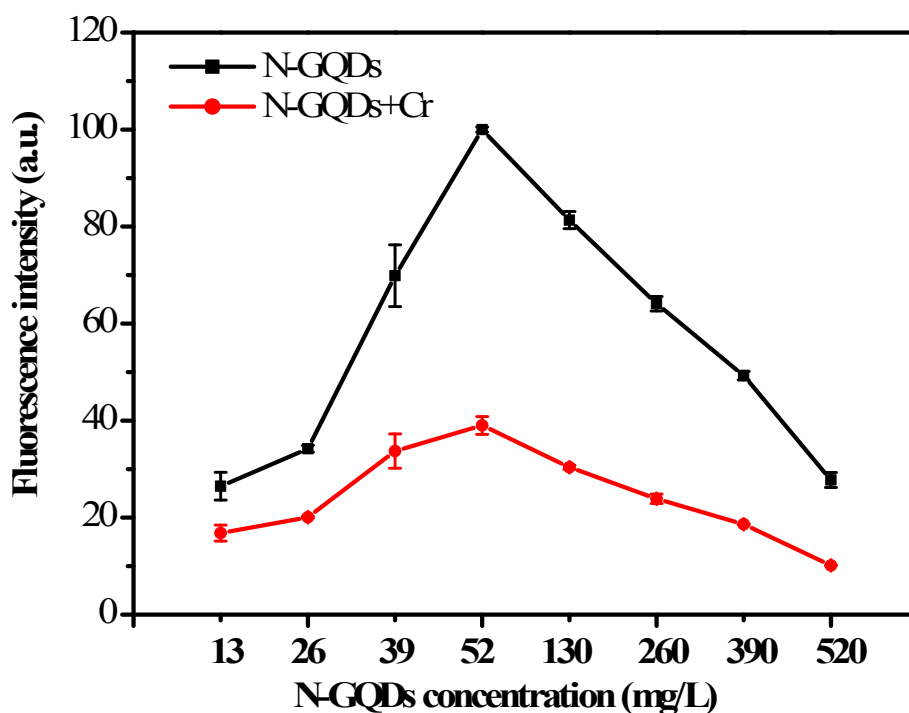

Figure S9. Effect of N-GQDs concentration on the fluorescence intensity in the absence and presence of 140  $\mu$ M Cr(VI). Error bars represent one standard deviation for three measurements.

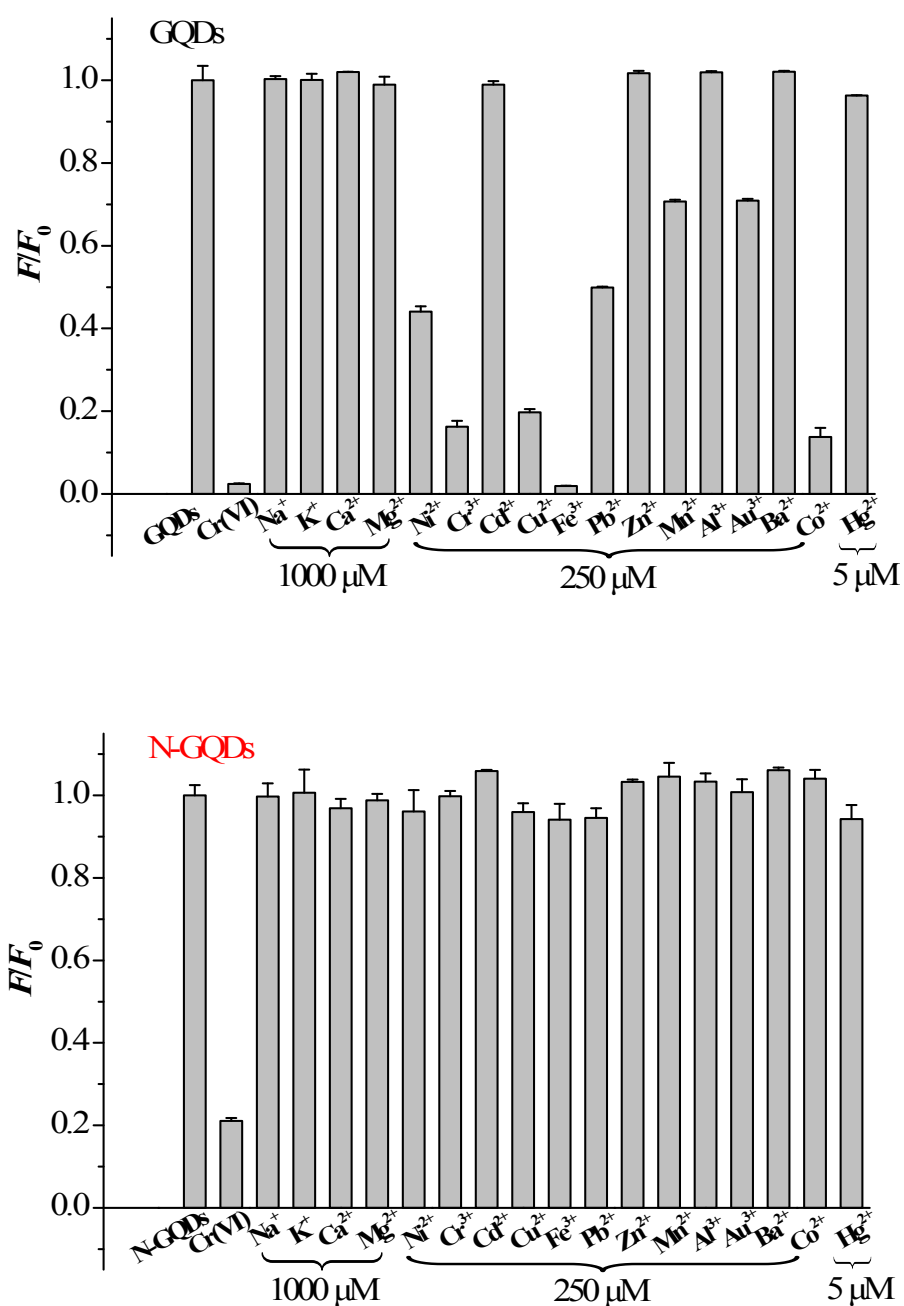

**Figure S10.** Relative fluorescence intensities ( $F/F_0$  at 430 nm) of the GQDs and N-GQDs solutions after addition of 140  $\mu\text{M}$  Cr(VI) and various other ions at 5 to 1000  $\mu\text{M}$ . The error bars denote standard deviations based on three independent measurements.
